# Supplementary material for: Correlation between alterations of gut microbiota and miR-122-5p expression in patients with type 2 diabetes mellitus
Source: PubMed Central journal article supplement — Ann Transl Med. 2020 Nov;8(22):1481. doi: 10.21037/atm-20-6717 (PMC7729379; doi:10.21037/atm-20-6717), 2020-11
Supplement: atm-08-22-1481-dss.pdf [file atm-08-22-1481-dss.pdf]

## Data Sharing Statement

|                     |                                                                                                                                                     |                                                                                                                                                                                                                                                               |
|---------------------|-----------------------------------------------------------------------------------------------------------------------------------------------------|---------------------------------------------------------------------------------------------------------------------------------------------------------------------------------------------------------------------------------------------------------------|
| <b>Article Info</b> | <a href="http://dx.doi.org/10.21037/atm-20-6717">http://dx.doi.org/10.21037/atm-20-6717</a>                                                         |                                                                                                                                                                                                                                                               |
| <b>Item</b>         | <b>Question</b>                                                                                                                                     | <b>Authors' Response<br/>(place "-" if not applicable)</b>                                                                                                                                                                                                    |
| 1                   | Would you like to share data collected for your study to others?                                                                                    | Yes.                                                                                                                                                                                                                                                          |
| 2                   | If not, would you like to share the reason for your decision?                                                                                       | -                                                                                                                                                                                                                                                             |
| 3                   | What data in particular will be shared?                                                                                                             | Specific gut microbiota and miRNA characteristics in patients who are newly diagnosed with T2DM. Here, it should be noted that bioinformatics resource we used in this study for the prediction of gut microbiota and miRNAs related gene targets are opened. |
| 4                   | Any other documents will be shared? Such as study protocol, statistical analysis plan, informed consent form, clinical study report, analytic code. | Statistical analysis plan and informed consent form will also be shared if requested.                                                                                                                                                                         |
| 5                   | When will data availability begin?                                                                                                                  | From the publication date.                                                                                                                                                                                                                                    |
| 6                   | When will data availability end?                                                                                                                    | Two years within the publication date, since the technique or survival date may be updated over time.                                                                                                                                                         |
| 7                   | To whom will you share the data?                                                                                                                    | Endocrinologists, medical laboratory technicians and researchers who are interested in the microRNA and gut microbiota in T2DM diagnosis and therapy.                                                                                                         |
| 8                   | For what type of analysis or purpose?                                                                                                               | For purpose to find the key molecular targets to the early diagnosis and precise treatment of T2DM.                                                                                                                                                           |
| 9                   | How or where can the data/documents be obtained?                                                                                                    | Emails could be sent to the address below to obtain the shared data: Lisaum@163.com.                                                                                                                                                                          |
| 10                  | Any other restrictions?                                                                                                                             | We may balance the potential benefits and risks for each request and then provide the data that could be shared.                                                                                                                                              |
